# Supplementary material for: Engineering spatial-organized cardiac organoids for developmental toxicity testing
Source: PubMed Central journal article supplement — Stem Cell Reports. 2021 Apr 22;16(5):1228–44. doi: 10.1016/j.stemcr.2021.03.013 (PMC8185451; doi:10.1016/j.stemcr.2021.03.013), 2021-04-22
Supplement: mmc1.pdf [file mmc1.pdf]

**Stem Cell Reports, Volume 16**

**Supplemental Information**

**Engineering spatial-organized cardiac organoids for developmental toxicity testing**

**Plansky Hoang, Andrew Kowalczewski, Shiyang Sun, Tackla S. Winston, Adriana M. Archilla, Stephanie M. Lemus, A. Gulhan Ercan-Sencicek, Abha R. Gupta, Wenzhong Liu, Maria I. Kontaridis, Jeffrey D. Amack, and Zhen Ma**

## Supplemental Figures

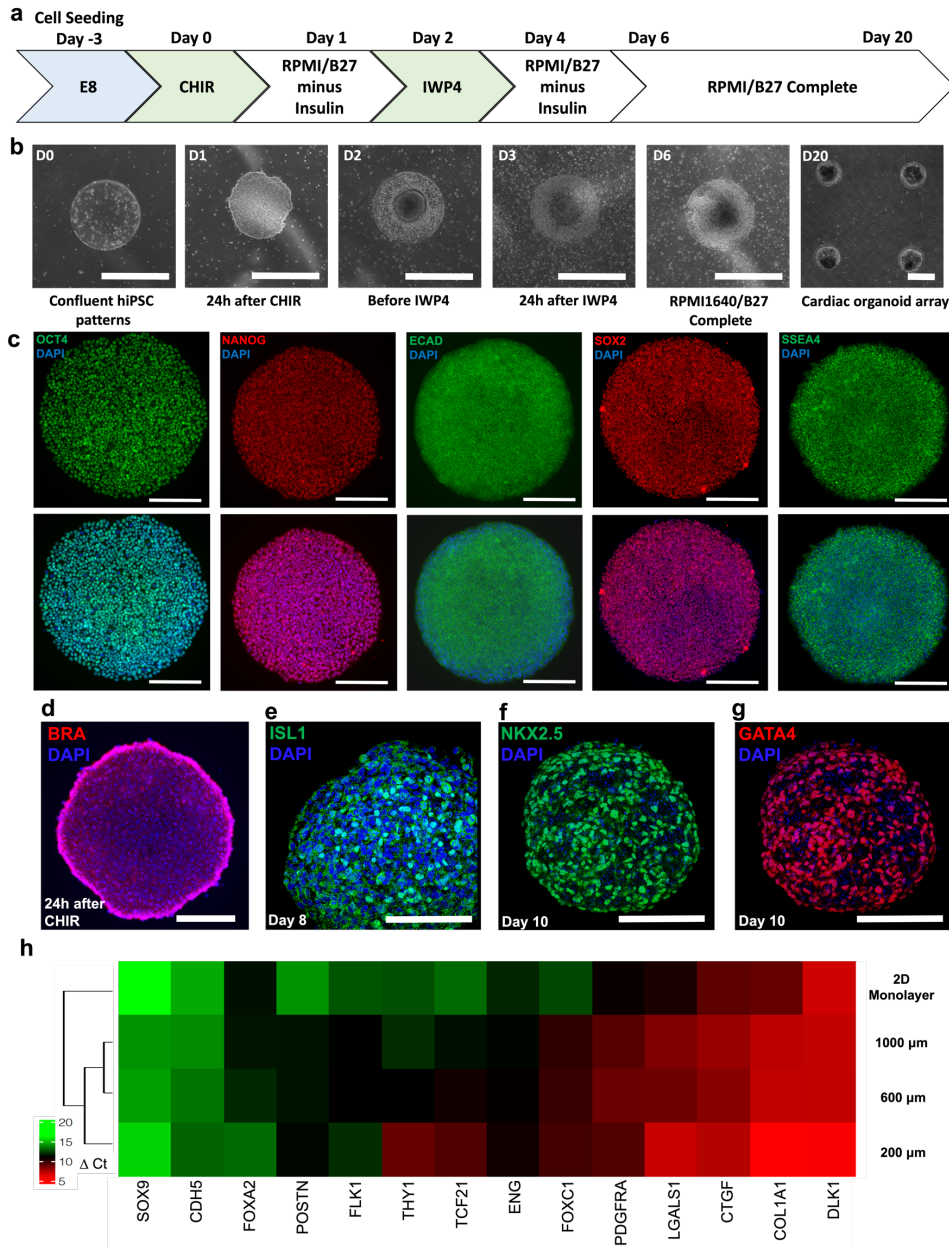

**Supplemental Figure 1.** (a) Cardiac differentiation timeline to generate cardiac organoids. (b) Patterned cell morphology changes from 2D monolayer of cells (D0) into 3D tissue (D6 onward) throughout differentiation; scale bars 600  $\mu$ m. (c) Patterned hiPSCs retain expression of pluripotent markers when confluent (From left to right: OCT4, NANOG, ECAD, SOX2, SSEA4). (d) 24h after CHIR treatment, patterned hiPSCs express mesodermal marker brachyury. (e) On Day 8 of differentiation, cardiac organoids express ISL1, followed by (f) NKX2.5 and (g) GATA4 on Day 10, indicative of early cardiac progenitor cells. (h) Stromal gene expression illustrates higher upregulation of stromal markers in organoids relative to 2D monolayer differentiation and higher upregulation of stromal cell makers in 200- $\mu$ m organoids relative to 600- $\mu$ m and 1000- $\mu$ m organoids.  $\Delta$ Ct values were calculated relative to the average Ct of GAPDH and 18S housekeeping controls. Scale bars 200  $\mu$ m.

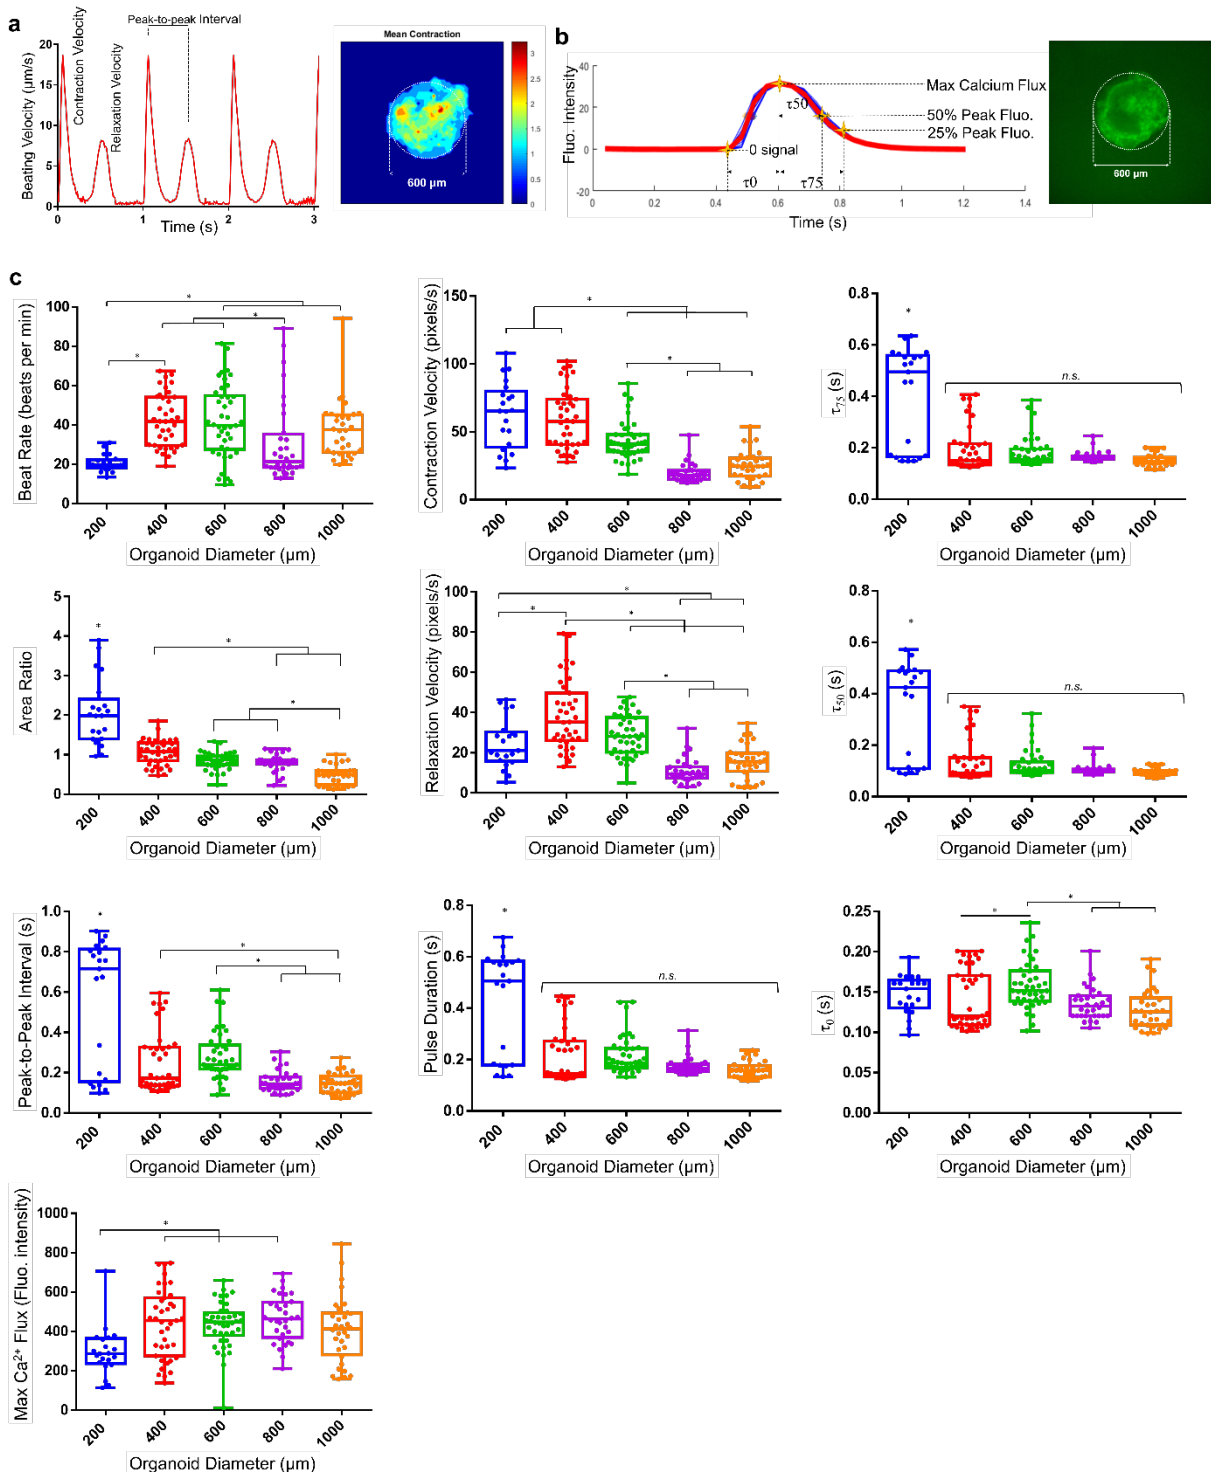

**Supplemental Figure 2.** Contraction function analysis of cardiac organoids generated from GCaMP6f hiPSCs.

Videos of beating organoids were characterized with using motion tracking analysis to generate (a) motion waveform where each double-peak represents a contraction-relaxation cycle. The Peak-to-peak interval describes the time between the contraction and relaxation peaks. (b) Transient calcium flux signals were acquired from capturing videos of GCaMP6f cardiac organoids and plotting z-axis profiles using ImageJ. Fluorescence bleaching (descending blue

signal) was corrected (red signal) using in-house MATLAB scripts. Time decay parameters  $\tau_0$ ,  $\tau_{50}$ , and  $\tau_{75}$  were acquired by measuring time intervals from the signal initiation to the maximum calcium flux ( $\tau_0$ ), for the maximum flux to decay to 50% ( $\tau_{50}$ ), and for the maximum flux to decay to 25% ( $\tau_{75}$ ). All figures represent schematic illustrations of characterization parameters. (c) Raw data metrics used for data mining and tSNE clustering of organoid contraction functions. Individual points for each variable are shown to illustrate sample distribution. Comparable trends are seen where small patterns significantly prolong the beat duration, based on metrics  $\tau_{75}$ ,  $\tau_{50}$ , peak-to-peak interval and pulse duration. This can be correlated to the area ratio, which is also significantly greater in small 200  $\mu\text{m}$  organoids. Moreover, most variables illustrated some degree of pattern size dependency, with the most significant functional variations seen in 200  $\mu\text{m}$  organoids. All statistics analyzed using ANOVA with Tukey multiple comparison tests.  $p \leq 0.05$  is considered significant (\*).

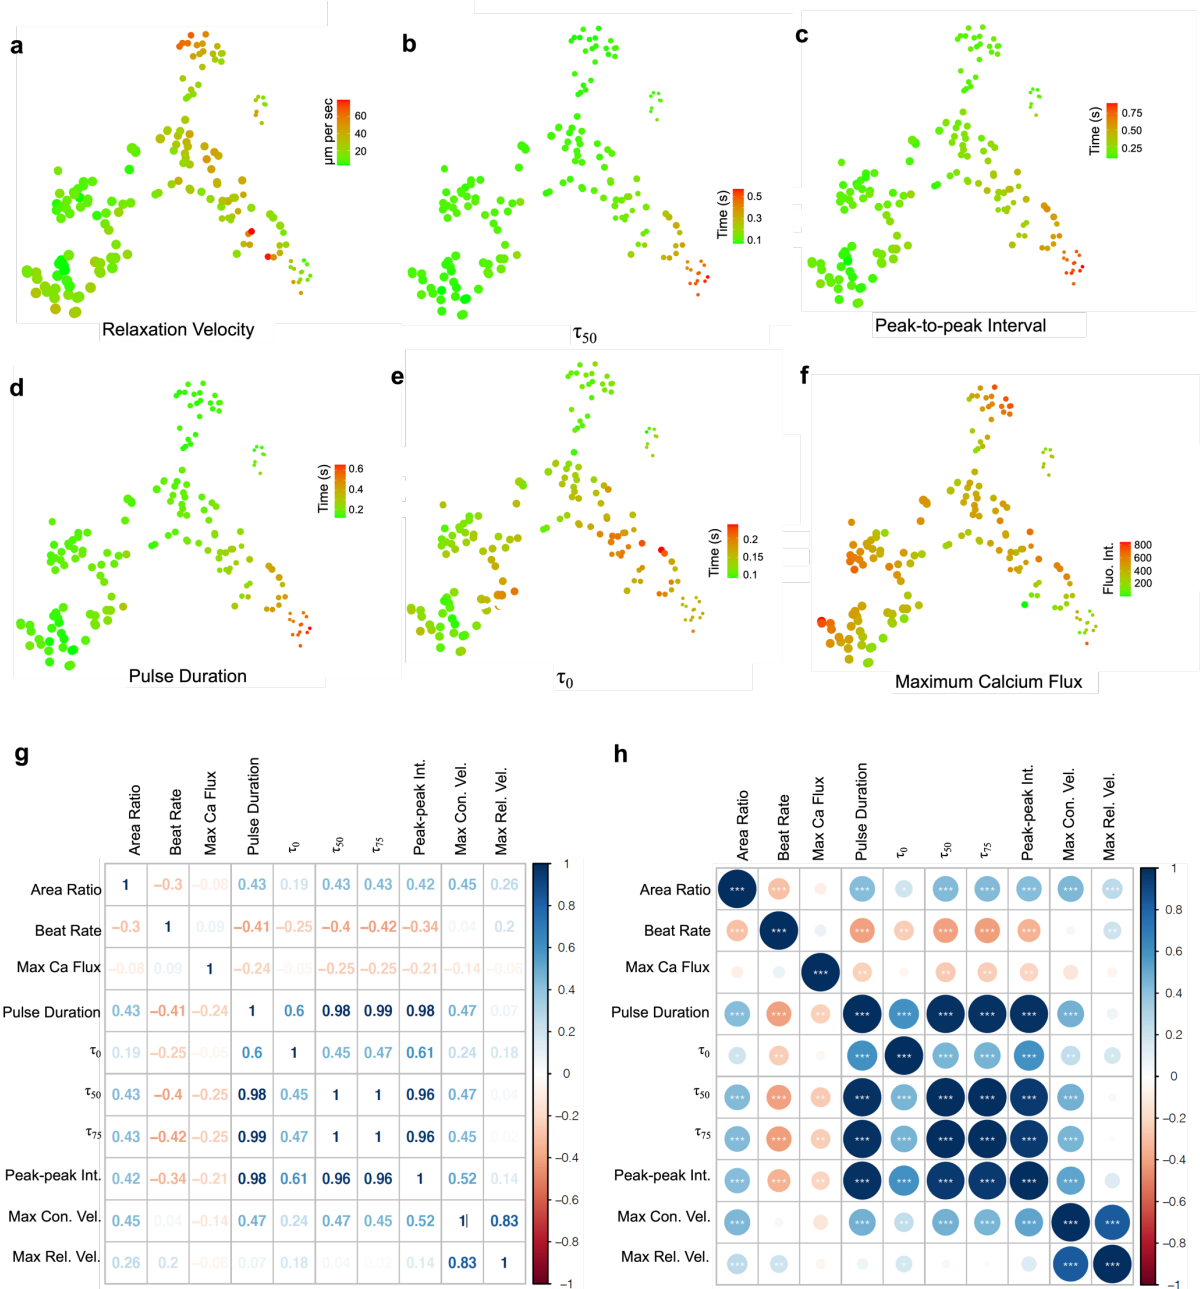

**Supplemental Figure 3.** *t*-SNE gradient plots of contraction functions of cardiac organoids. Contraction function was plotted using color gradients to illustrate the influence of organoid size on (a) relaxation velocity, (b)  $\tau_{50}$ , (c) peak-to-peak-interval, (d) pulse duration, (e)  $\tau_0$ , and (f) maximum calcium flux. Small organoids primarily exhibited longer contraction duration cycles, as indicated by higher values in relaxation velocity,  $\tau_{50}$ , peak-to-peak interval, and pulse duration. All organoids exhibited comparable patterns of maximum calcium flux, indicating that size did not impair the cardiac organoid ability to attain peak contraction. (g) Correlation coefficients showing individual variables correlation with other variable. A correlation coefficient closer to 1 is equivalent to positive correlation, where negative correlation is associated with values close to -1. (h) P-value representation of correlation coefficient significance. (\*) denotes  $p \leq 0.05$ ; (\*\*) denotes  $p \leq 0.01$ ; (\*\*\*) denotes  $p \leq 0.001$ .

**a Amoxicillin (Category B)**

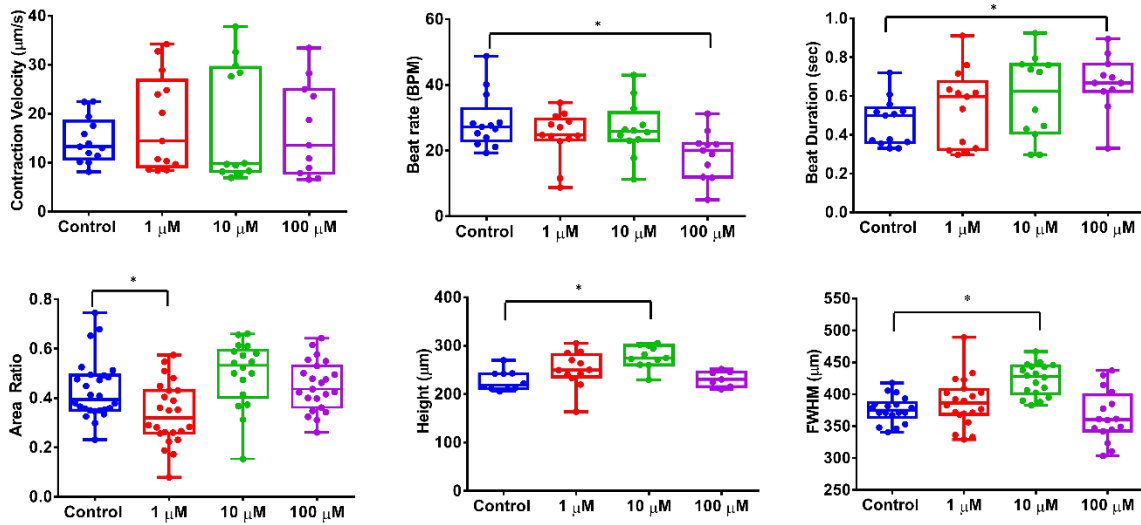

**b Rifampicin (Category C)**

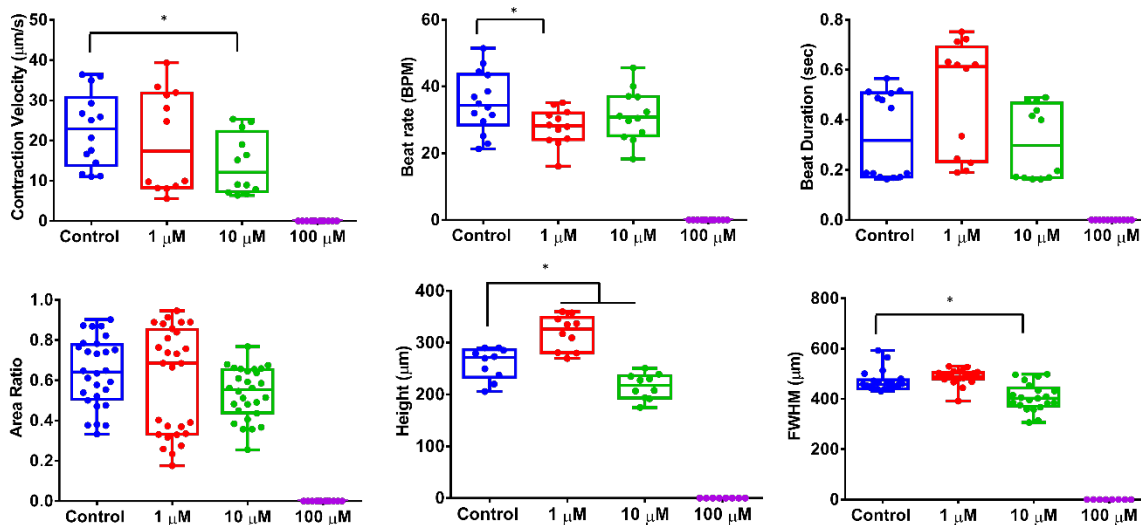

**Supplemental Figure 4.** Developmental toxicity assay of cardiac organoids in response to treatment with Category B and C drugs. (a) Amoxicillin showed moderate toxicity with decreased beat rate (ANOVA,  $n \geq 11$ ,  $*p = 0.0215$ ) and increased beat duration (ANOVA,  $n \geq 11$ ,  $*p = 0.0484$ ) at high concentrations. Amoxicillin treatment at low concentrations, however, produced smaller cardiac tissues in area ratio (ANOVA,  $n \geq 18$ ,  $*p = 0.0003$  between Controls and 1 µM), height (ANOVA,  $n \geq 7$ ,  $*p = 0.0006$ ), and FWHM (ANOVA,  $n \geq 16$ ,  $*p \leq 0.0001$ ). (b) Developmental toxicity assay of cardiac organoids in response to treatment with Category C drug, Rifampicin. In all assays, cardiac organoids failed to differentiate at 100 µM treatment, and toxicity was also observed in contraction velocity (ANOVA,  $n \geq 12$ ,  $*p < 0.0001$ ), beat rate (ANOVA,  $n \geq 12$ ,  $*p < 0.05$ ), height (ANOVA,  $n \geq 10$ ,  $*p \leq 0.05$ ) and in FWHM (ANOVA,  $n \geq 21$ ,  $*p < 0.05$ ).

### a Doxycycline (Category D)

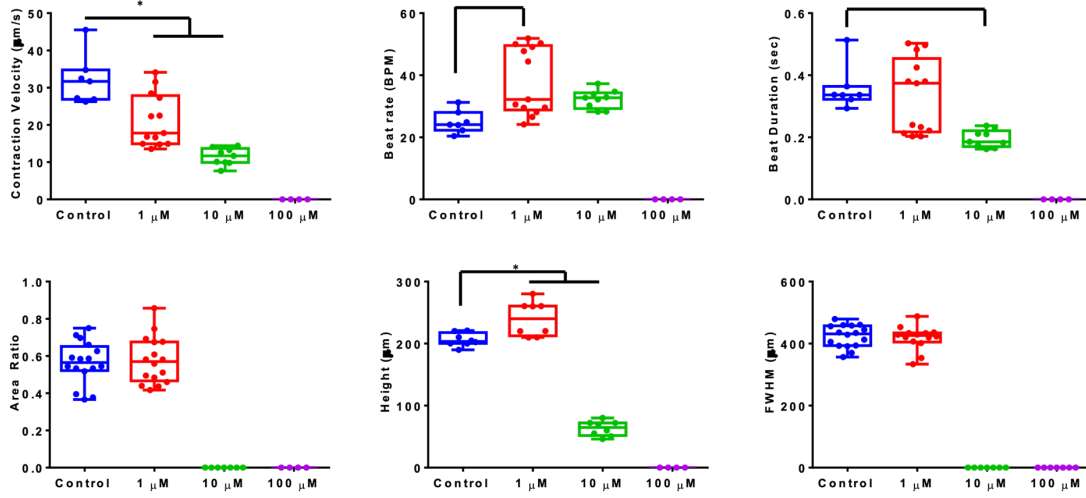

### b Lithium Carbonate (Category D)

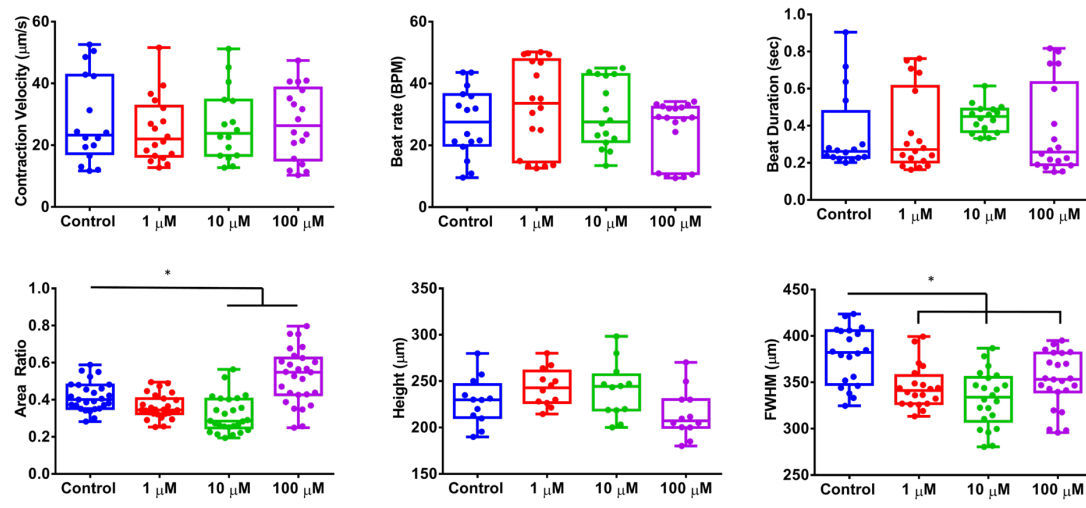

### c Phenytoin (Category D)

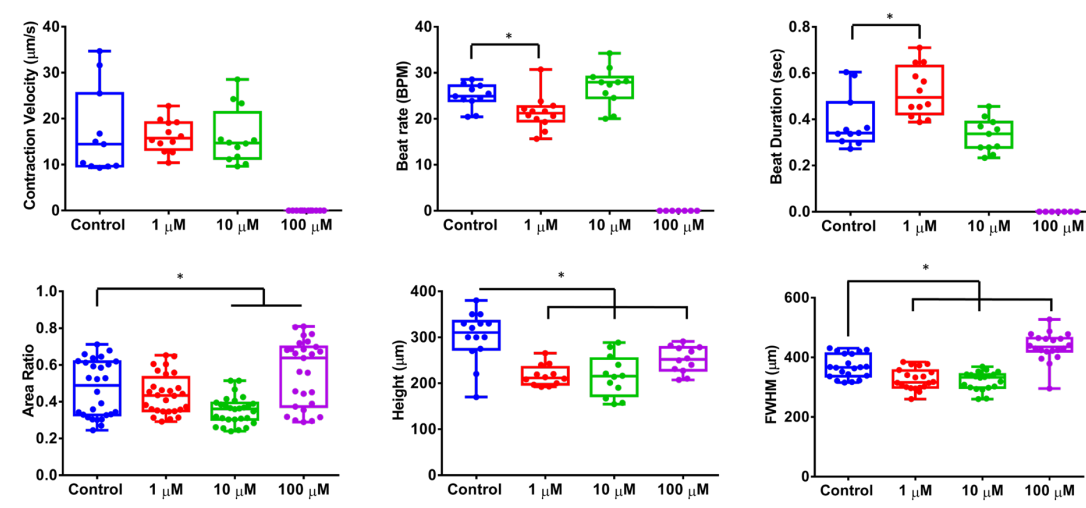

**Supplemental Figure 5.** Developmental toxicity assay of cardiac organoids in response to treatment with Category D drugs. (a) With doxycycline treatment, cardiac organoids failed to differentiate at 100  $\mu\text{M}$  treatment, and did not form robust cardiac tissues at 10  $\mu\text{M}$ . Significant toxicity was observed in contraction velocity (ANOVA,  $n \geq 7$ ,  $*p < 0.05$ ), beat rate (ANOVA,  $n \geq 7$ ,  $*p < 0.05$ ), beat duration (ANOVA,  $n \geq 7$ ,  $*p \leq 0.0001$ ), and height (ANOVA,  $n = 8$ ,  $*p 0.05$  relative to controls) and in FWHM (ANOVA,  $n \geq 21$ ,  $*p < 0.05$ ). (b) With lithium carbonate treatment, no significant toxicity effects were seen in any contraction function. However, moderate toxicity was seen in higher concentrations for the area ratio (ANOVA,  $n \geq 26$ ,  $*p \leq 0.0001$ ) and in FWHM (ANOVA,  $n \geq 20$ ,  $*p \leq 0.0001$ ) relative to the controls. (c) Phenytoin showed no contractile functions at 100  $\mu\text{M}$  concentration, with moderate effects at 1  $\mu\text{M}$  on beat rate (ANOVA,  $n \geq 11$ ,  $*p < 0.0001$ ) and beat duration (ANOVA,  $n \geq 11$ ,  $*p < 0.0001$ ). Organoids were also smaller in area ratio at 10  $\mu\text{M}$  treatment (ANOVA,  $n = 28$ ,  $*p < 0.0001$ ) and smaller at all concentrations in height (ANOVA,  $n \geq 12$ ,  $*p \leq 0.0001$ ) and at low and moderate concentrations in FWHM (ANOVA,  $n=20$ ,  $*p \leq 0.0001$ ) relative to controls.



**a All-trans retinoic acid/Tretinoin (Category D)**

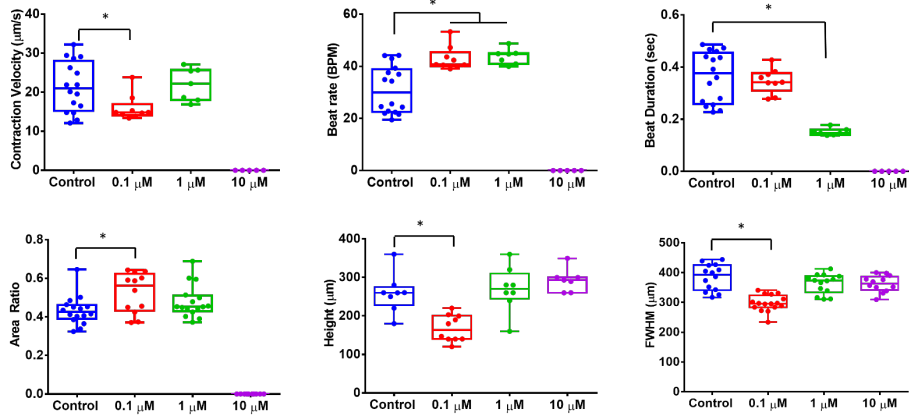

**b 13-cis retinoic acid/Isotretinoin (Category X)**

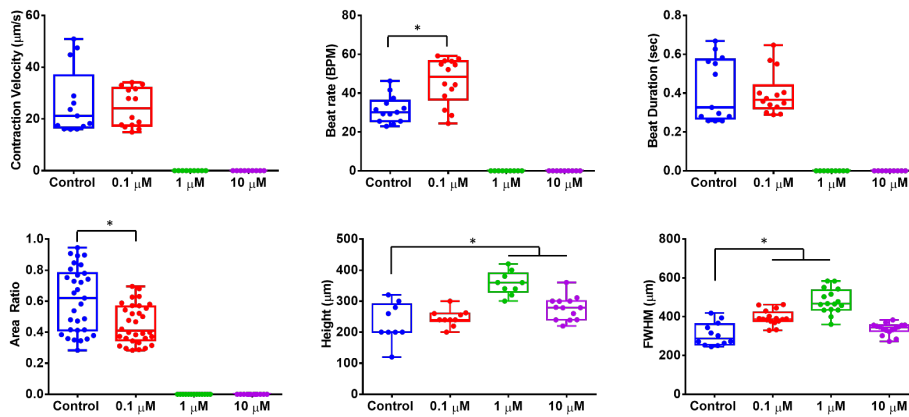

**c**

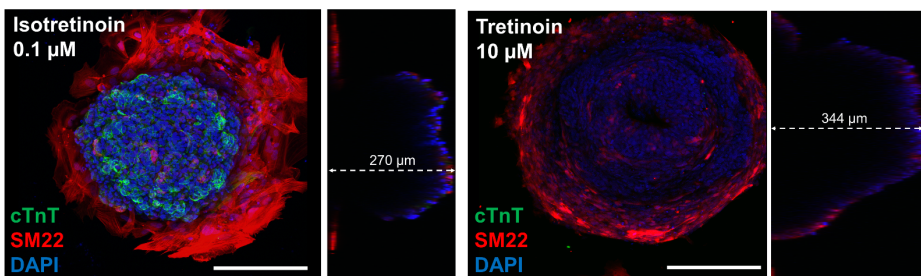

**Supplemental Figure 6.** Developmental toxicity assay of cardiac organoids in response to treatment with retinoids Tretinoin (Category D) and Isotretinoin (Category X). (a) With tretinoin, cardiac tissue failed to differentiate at 10  $\mu\text{M}$  concentrations with no contraction functions. Contraction velocity was lower at 0.1  $\mu\text{M}$  (ANOVA,  $n \geq 7$ ,  $*p < 0.0001$ ), whereas beat rate was faster at 0.1  $\mu\text{M}$  and 1  $\mu\text{M}$  (ANOVA,  $n \geq 7$ ,  $*p < 0.0001$ ). Beat duration was significantly lower at 1  $\mu\text{M}$  (ANOVA,  $n \geq 7$ ,  $*p \leq 0.0001$ ) as well. Low concentration of 0.1  $\mu\text{M}$  also showed toxic effects on area ratio (ANOVA,  $n \geq 12$ ,  $*p \leq 0.0001$ ), height (ANOVA,  $n \geq 8$ ,  $*p < 0.0001$ ), and FWHM (ANOVA,  $n \geq 12$ ,  $*p \leq 0.0001$ ). (b) Cardiac tissue failed to develop at 1  $\mu\text{M}$  and 10  $\mu\text{M}$  concentrations with no contraction functions. Low concentration of 1  $\mu\text{M}$  resulted in faster beat rate (ANOVA,  $n \geq 13$ ,  $*p \leq 0.0001$ ) and smaller area ratio (ANOVA,  $n \geq 31$ ,  $*p \leq 0.0001$ ). However, high concentrations produced organoids that were significantly taller in height (ANOVA,  $n \geq 9$ ,  $*p \leq 0.0001$ ) and larger in FWHM (ANOVA,  $n \geq 12$ ,  $*p \leq 0.0001$ ). (c) Representative images show cardiac tissue formation at low (0.1  $\mu\text{M}$ ) concentration, but a large mound with no cardiac tissue at high (10  $\mu\text{M}$ ) concentration of retinoid exposures. Scale bars 200  $\mu\text{m}$ .

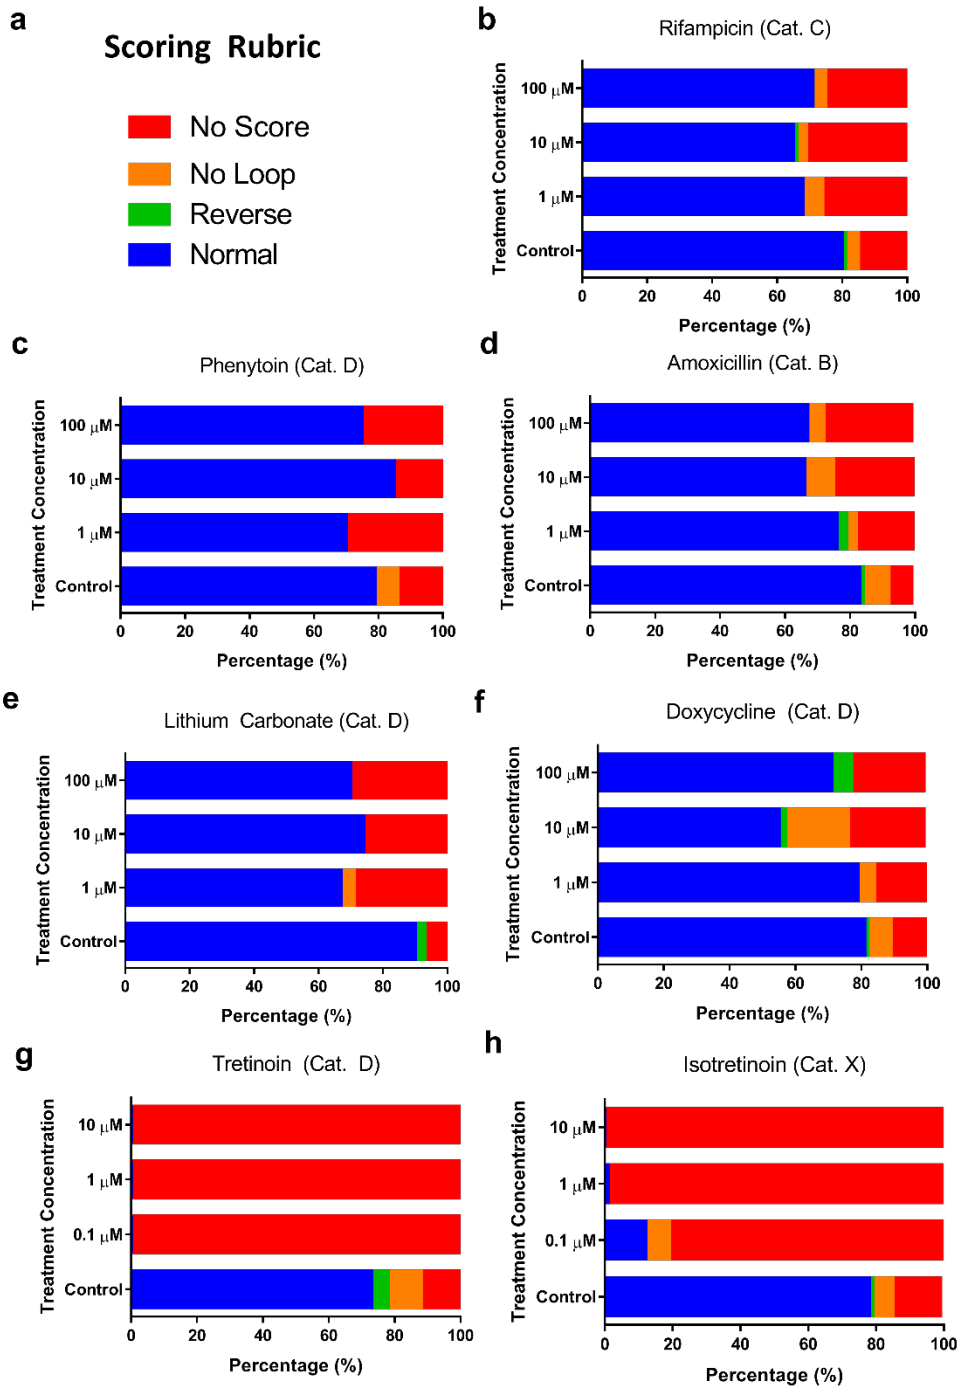

**Supplemental Figure 7.** Zebrafish whole embryo culture (zWEC) assay of cardiac looping for seven drug compounds. (a) Morphological scoring was performed on heart structures of developing zebrafish embryos based on either normal (D-loop), reverse (L-loop), no loop, or no score where the heart did not express GFP and/or fall into the previous three categories. (b) Category C rifampicin and (c) Category D phenytoin produced mild developmental toxic effect. (d-f) Various drugs displayed moderate developmental toxicity amoxicillin (Category B), lithium carbonate (Category D), and doxycycline (Category D). Retinoids (g) Category D tretinoin and (h) Category X isotretinoin produced severe developmental toxic effects at all concentrations. (h) A sample size of  $n > 19$  embryos (pooled from 3 independent experiments) was used for all treatment groups.

## **Supplemental Movies**

**Supplemental Movie 1.** Three-dimensional confocal microscopy reconstructions of a cardiac organoids of 200  $\mu\text{m}$  diameter (left), 600  $\mu\text{m}$  diameter (middle), and 1000  $\mu\text{m}$  diameter (right).

**Supplemental Movie 2.** Cross sectional reconstructions in z-direction of cardiac organoids of 200  $\mu\text{m}$  diameter (left), 600  $\mu\text{m}$  diameter (middle), and 1000  $\mu\text{m}$  diameter (right).

**Supplemental Movie 3.** Cardiac organoids of 200  $\mu\text{m}$  diameter (left), 600  $\mu\text{m}$  diameter (middle), and 1000  $\mu\text{m}$  diameter (right) exhibiting spontaneous contraction.

**Supplemental Movie 4.** Transient calcium flux of cardiac organoids of 200  $\mu\text{m}$  diameter (left), 600  $\mu\text{m}$  diameter (middle), and 1000  $\mu\text{m}$  diameter (right).

## Supplemental Tables

**Supplemental Table 1. List of drug compounds with medicinal uses and previously designated pregnancy category.**

| <b>Drug</b>              | <b>Medicinal Use</b>                           | <b>Pregnancy Category</b> | <b>Concentrations Tested</b>       |
|--------------------------|------------------------------------------------|---------------------------|------------------------------------|
| Doxylamine Succinate     | Antihistamine, sleeping aid                    | A                         | 1 $\mu$ M, 10 $\mu$ M, 100 $\mu$ M |
| Amoxicillin              | Antibiotic (strep, middle ear infections etc.) | B                         | 1 $\mu$ M, 10 $\mu$ M, 100 $\mu$ M |
| Rifampicin               | Antibiotic (TB, leprosy etc.)                  | C                         | 1 $\mu$ M, 10 $\mu$ M, 100 $\mu$ M |
| Lithium Carbonate        | Bipolar antidepressant                         | D                         | 1 $\mu$ M, 10 $\mu$ M, 100 $\mu$ M |
| Phenytoin                | Anticonvulsant                                 | D                         | 1 $\mu$ M, 10 $\mu$ M, 100 $\mu$ M |
| Doxycycline              | Antibiotic                                     | D                         | 1 $\mu$ M, 10 $\mu$ M, 100 $\mu$ M |
| All-trans-RA (Tretinoin) | Acne treatment                                 | D                         | 0.1 $\mu$ M, 1 $\mu$ M, 10 $\mu$ M |
| 13-cis-RA (Isotretinoin) | Acne treatment                                 | X                         | 0.1 $\mu$ M, 1 $\mu$ M, 10 $\mu$ M |
| Thalidomide              | Myeloma, Inflammation                          | X                         | 1 $\mu$ M, 10 $\mu$ M, 100 $\mu$ M |

**Supplemental Table 2. List of primary and secondary antibodies used for immunofluorescent staining and imaging.**

| <b>Primary antibodies (species)</b>    | <b>Vendor</b>            | <b>Catalog No.</b> | <b>Dilution</b> |
|----------------------------------------|--------------------------|--------------------|-----------------|
| Cardiac troponin T (mouse)             | Thermo Fisher Scientific | MS295P             | 1:200           |
| Sarcomeric $\alpha$ -actinin (mouse)   | Sigma-Aldrich            | A7811              | 1:300           |
| Myosin heavy chain (mouse)             | Abcam                    | Ab97715            | 1:200           |
| Cardiac troponin I (rabbit)            | Abcam                    | Ab47003            | 1:200           |
| Vimentin (mouse)                       | Thermo Fisher Scientific | MA5-11883          | 1:100           |
| $\alpha$ -SM22 (rabbit)                | Abcam                    | Ab14106            | 1:300           |
| Calponin (rabbit)                      | Abcam                    | Ab46794            | 1:200           |
| $\alpha$ -Smooth muscle actin (rabbit) | Abcam                    | Ab5694             | 1:100           |
| OCT4 (rabbit)                          | Abcam                    | Ab18976            | 1:200           |
| NANOG (mouse)                          | Thermo Fisher Scientific | MA1-017            | 1:100           |
| SSEA4 (mouse)                          | Stem Cell Technologies   | 60062              | 1:200           |
| SOX2 (rabbit)                          | Thermo Fisher Scientific | PA1-094            | 1:100           |
| E-cadherin (mouse)                     | Abcam                    | Ab1416             | 1:200           |
| <b>Secondary Antibodies</b>            |                          |                    |                 |
| Alexa Fluor 488 goat anti-mouse        | Thermo Fisher Scientific | A-11029            | 1:200           |
| Alexa Fluor 546 goat anti-mouse        | Thermo Fisher Scientific | A11003             | 1:200           |
| Alexa Fluor 488 goat anti-rabbit       | Thermo Fisher Scientific | A11008             | 1:200           |
| Alexa Fluor 546 goat anti-rabbit       | Thermo Fisher Scientific | A11010             | 1:200           |

**Supplemental Table 3. TaqMan arrays used for cardiogenic and stromal gene expression analyses**

| Taqman Assay ID | Gene/Array Name | Taqman Assay ID | Gene/Array Name |
|-----------------|-----------------|-----------------|-----------------|
| Hs00153836 m1   | ACVR1           | Hs00276431 m1   | NOX4            |
| Hs00923299 m1   | ACVR1B          | Hs00383231 m1   | NPPA            |
| Hs00155658 m1   | ACVR2A          | Hs00173590 m1   | NPPB            |
| Hs00609603 m1   | ACVR2B          | Hs00176973 m1   | PRKCA           |
| Hs00181051 m1   | APC             | Hs00176998 m1   | PRKCB           |
| Hs00153179 m1   | ATF2            | Hs01090047 m1   | PRKCD           |
| Hs00394718 m1   | AXIN1           | Hs00178455 m1   | PRKCE           |
| Hs00205566 m1   | BMP10           | Hs00177010 m1   | PRKCG           |
| Hs00154192 m1   | BMP2            | Hs00702254 s1   | PRKCI           |
| Hs00370078 m1   | BMP4            | Hs00989970 m1   | PRKCCQ          |
| Hs00233476 m1   | BMP7            | Hs00177051 m1   | PRK CZ          |
| Hs01034913 g1   | BMPRI1A         | Hs01078066 m1   | RB1             |
| Hs00176144 m1   | BMPRI1B         | Hs00195432 m1   | SMAD1           |
| Hs00176148 m1   | BMPRI2          | Hs00183425 m1   | SMAD2           |
| Hs01026536 m1   | CCNE1           | Hs00929647 m1   | SMAD4           |
| Hs00372959 m1   | CCNE2           | Hs00195437 m1   | SMAD5           |
| Hs00154374 m1   | CDC6            | Hs00195441 m1   | SMAD9           |
| Hs00270923 s1   | CEBPB           | Hs00396596 m1   | TBX20           |
| Hs00193796 m1   | CER1            | Hs01052563 m1   | TBX5            |
| Hs00175141 m1   | CHUK            | Hs00413032 m1   | TCF3            |
| Hs00355045 m1   | CTNNA1          | Hs01009038 m1   | TCF7L2          |
| Hs00183740 m1   | DKK1            | Hs02339499 g1   | TDGF1           |
| Hs00737028 m1   | DVL1            | Hs00998133 m1   | TGFB1           |
| Hs00153451 m1   | E2F1            | Hs00234244 m1   | TGFB2           |
| Hs00231667 m1   | E2F2            | Hs01086000 m1   | TGFB3           |
| Hs00605457 m1   | E2F3            | Hs00610318 m1   | TGFB R1         |
| Hs00608098 m1   | E2F4            | Hs00234253 m1   | TGFB R2         |
| Hs00231092 m1   | E2F5            | Hs00182986 m1   | WNT11           |
| Hs00242501 m1   | E2F6            | Hs00263977 m1   | WNT3A           |
| Hs00266645 m1   | FGF2            | Hs00230534 m1   | WNT8A           |
| Hs00268943 s1   | FZD1            | Hs00610126 m1   | WNT8B           |
| Hs00273077 s1   | FZD10           | Hs00426835 g1   | ACTA2           |
| Hs00184043 m1   | FZD3            | Hs00901465 m1   | CDH5            |
| Hs00201853 m1   | FZD4            | Hs00959434 m1   | CNN1            |
| Hs00361869 g1   | FZD5            | Hs00164004 m1   | COL1A1          |
| Hs00171574 m1   | FZD6            | Hs00170014 m1   | CTGF            |
| Hs00275833 s1   | FZD7            | Hs00171584 m1   | DLK1            |
| Hs00259040 s1   | FZD8            | Hs00923996 m1   | ENG             |
| Hs00171403 m1   | GATA4           | Hs00911700 m1   | FLK1            |
| Hs01053355 m1   | GNAI1           | Hs00232764 m1   | FOXA2           |
| Hs01064686 m1   | GNAI2           | Hs00559473 s1   | FOXC1           |
| Hs00197803 m1   | GNAI3           | Hs00355202 m1   | LGALS1          |
| Hs00387073 m1   | GNAQ            | Hs01101425 m1   | MYH6            |
| Hs00255603 m1   | GNAS            | Hs04187281 m1   | MYL4            |
| Hs01564092 m1   | GNB3            | Hs00998018 m1   | PDGFRA          |
| Hs00275656 m1   | GSK3B           | Hs01065279 m1   | PECAM1          |
| Hs00231848 m1   | HAND1           | Hs01566750 m1   | POSTN           |
| Hs00232769 m1   | HAND2           | Hs00165814 m1   | SOX9            |
| Hs00167041 m1   | HNF1A           | Hs01038777 g1   | TAGLN           |
| Hs01001602 m1   | HNF1B           | Hs01385457 m1   | TBX18           |
| Hs00230853 m1   | HNF4A           | Hs00911929 m1   | TBX2            |
| Hs00212390 m1   | LEF1            | Hs00162646 m1   | TCF21           |
| Hs00745761 s1   | LEFTY2          | Hs00174816 m1   | THY1            |
| Hs00177373 m1   | MAP3K7          | Hs00165957 m1   | TNNI3           |
| Hs00176247 m1   | MAPK14          | Hs00943911 m1   | TNNT2           |
| Hs00231149 m1   | MEF2C           | Hs00958111 m1   | VIM             |
| Hs01110632 m1   | MYH7            | Hs01103751 m1   | WT1             |
| Hs00293096 m1   | MYH7B           | Hs99999905 m1   | GAPDH (HK)      |
| Hs00166405 m1   | MYL2            | Hs99999909 m1   | HPRT1 (HK)      |
| Hs00231763 m1   | NKX2-5          | Hs99999908 m1   | GUSB (HK)       |
| Hs00415443 m1   | NODAL           | Hs99999901 s1   | 18S (HK)        |

## **Experimental Procedures**

### **Micropatterning of tissue culture surfaces**

Surface micropatterning on tissue culture polystyrene was carried out using the selective etching approach described previously (Hoang et al., 2018). Patterned wafers were (SU8 master) fabricated using standard SU8 photolithography to fabricate molds with raised features of patterns. Poly(dimethyl siloxane) (PDMS) prepared at a 10:1 wt/wt ratio of elastomer base to curing agent was casted onto SU8 masters and clamped down using clear transparency sheets and glass slides. This process produced thin PDMS stencils with clear-through holes from the raised patterns on the SU8 master molds. Non-fouling poly(ethylene glycol) (PEG) solution was prepared by combining 150 mg PEG 1000 (Polysciences, cat. no. 16666), 1.8 mL PEGDA 400 (Polysciences, cat. no. 01871), 14.55 mL isopropyl alcohol, and 0.45 mL MilliQ water. The solution was grafted onto 6-well tissue culture plates and cured under UV light exposure (Dymax UV Illuminator; model no. 2000EC) for 45 seconds. Micropatterns were fabricated by selective oxygen plasma etching (Oxygen plasma treatment system, PlasmaEtch PE50XL) of the PEG using the PDMS stencils. Micropatterned tissue culture plates were sterilized by immersing in 70% ethanol for 1 hour and subsequent washing with sterile phosphate buffered saline (PBS).

### **Cell lines**

Wild-type (WTC) hiPSC line was obtained from Dr. Conklin's laboratory at the Gladstone Institute of Cardiovascular Research. This hiPSC line was derived from a skin biopsy from a healthy adult Asian male donor in his early thirties. The original fibroblasts were reprogrammed using episomal methods with the factors of LIN28A, MYC (c-MYC), POU5F1 (OCT4) and SOX2. WTC GCaMP6f hiPSC line was generated in Dr. Conklin's laboratory by targeting to the AAVS1 locus of WTC cells. A strong constitutive promoter (CAG) drives the expression of the GCaMP6f ORF. Yale-WT hiPSCs line was obtained from Dr. Abha Gupta's laboratory at the Yale University Department of Pediatrics and Child Study Center. Briefly hiPSCs were generated from the T-lymphocytes of a 25-year-old healthy South Asian male using the CytoTune-iPS Sendai Reprogramming kit as described previously (Liu et al., 2019).

### **Generation of cardiac organoids**

Micropatterned surfaces were coated with diluted Geltrex hESC-qualified matrix (Life Technologies, cat. no. A1413302) at 37 °C for 1 hour prior to cell seeding. hiPSCs were cultured using standard PSC practices in Essential 8 (E8) medium (Life Technologies, cat. no. A1517001). At passaging confluency, cells were dissociated with Accutase (Life Technologies, cat. no. A1110501) and seeded at a density of  $6.0 \times 10^5$  cells per well of the micropatterned 6-well plate ( $\sim 0.63 \times 10^5$  cells per  $\text{cm}^2$ ) supplemented with 10  $\mu\text{M}$  Y27632 (BioVision, cat. no. 1784-5). Cardiac differentiation was initiated approximately 3 days after seeding (Day 0) when the micropatterns reached confluency, and performed via small molecule modulation of the Wnt/ $\beta$ -catenin pathway (Lian et al., 2012) with GSK3 inhibitor CHIR99021 (Day 0) (Stemgent, cat. no. 04-0004) and WNT pathway inhibitor IWP4 (Day 2) (Stemgent, cat. no. 04-0036). Small molecules were diluted in in RPMI 1640 medium (Life Technologies, cat. no. 11875093) supplemented with B27-minus insulin (RPMI/B27 minus insulin) (Life technologies, cat. no. A1895601). Cardiac organoids began to contract around Day 9 of differentiation and were maintained in RPMI 1640 medium supplemented with complete B27 supplement (RPMI/B27 Complete) (Life Technologies cat. no. 17504044) until Day 20 for contractile and structural analysis.

### **Gene Expression Analysis**

Gene expression was quantified using real-time qPCR analysis. On Day 20 of differentiation, cardiac organoids were sacrificed for RT-qPCR analysis. RNA was extracted using the RNeasy Mini Kit (Qiagen cat. no. 74104) and stored in -80 °C until needed. The RNA was then converted to cDNA using the Superscript IV First Strand Synthesis kit (Thermofisher cat. no. 18091050). Genes of interest includes cardiomyocyte-specific genes and stromal cell genes, plus TaqMan array of human factors for cardiogenesis (Thermofisher cat. no. 4414134). Individual genes are listed in the Supplemental Table 3. PCR plates were prepared and then run using the QuantStudio 3 Real-Time PCR System. All data was normalized to the respective housekeeping genes that were run in parallel with the rest of the gene assays. Value of  $\Delta\text{Ct}$  was



calculated by subtracting the average Ct of housekeeping genes from the Ct of the genes of interest. Lower  $\Delta$ Ct indicates gene upregulation, where high  $\Delta$ Ct indicates gene downregulation.

### **Flow Cytometry Analysis**

Cardiac organoids were dissociated using 0.25% Trypsin for 10-15 minutes. Cells were collected, centrifuged and washed with PBS. Cells were fixed and permeabilized with a mixture of 4% (vol/vol) paraformaldehyde and 0.2% (vol/vol) TritonX solution for 15 minutes. Cells were incubated with primary antibody cardiac troponin T (Thermofisher cat. no. MA5-12960) in a 1:250 dilution for 1 hour in PBS, and then incubated with AlexaFluor 546 secondary fluorophore for an additional hour. The cell suspension was washed, centrifuged and filtered through 35  $\mu$ m mesh cell strainer. Flow cytometry was performed on the BDAccuriC6 at Flow Cytometry Core at Syracuse University

### **Drug treatment**

Concentrations were chosen after evaluation of blood plasma concentrations reported for each drug from the FDA drug information database ([accessdata.FDA.gov](https://accessdata.fda.gov)). Concentrations were chosen to be at or approximated by blood plasma concentrations, while accounting for drug solubility in water or DMSO, while also supplying a large range in order to detect potential toxicity. Drugs were diluted in the appropriate culture media at three concentrations each increasing by a factor of 10 with respective controls. Control samples were supplemented with water or DMSO ( $\leq 0.1\%$ ), depending on the solvent used to prepare the concentrated stock. Once initiated, the drugs were supplied continuously throughout the differentiation into cardiac organoids in order to mimic the continuous drug exposure during fetal development. Samples were terminated on Day 20 for motion tracking analysis and for fluorescence/confocal imaging to assess the developmental toxicity of specific drugs based on the organoid morphology and contractile physiology.

### **Analysis of contraction physiology**

Organoids were imaged in an onstage microscope incubator (OkoLab Stage Top Incubator, UNO-T-H-CO<sub>2</sub>) at 37 °C and 5% CO<sub>2</sub> to maintain standard physiological conditions on a Nikon Ti-E inverted microscope with Andor Zyla 4.2+ digital CMOS camera. Videos of contracting cardiac organoids were recorded at 50 frames per second for ten seconds in brightfield and exported as a series of single frame image files. Contraction physiology was assessed using video-based motion tracking software (Huebsch et al., 2015) that computes motion vectors based on block matching of pixel macroblocks from one frame to the next. The motion vectors were assimilated into a contraction motion waveform representative of contractile physiology, providing metrics such as contraction amplitude and frequency. Peak-to-peak interval is the time interval between contraction peak and relaxation peak.

Contraction physiology was also assessed by recording the calcium transient using GCaMP6f hiPSC-derived cardiac organoids. Videos were taken under GFP excitation at 40 ms exposure time with 25 frames per second. Calcium flux signals were exported as Z-axis profiles in ImageJ. The fluorescence bleaching decay was corrected and time decay parameters  $\tau_0$ ,  $\tau_{50}$ ,  $\tau_{75}$  were computed using in-house MATLAB scripts. The pulse duration is the time interval at which the calcium flux is at the half of the maximum flux. The time interval  $\tau_0$  is defined as the time it takes for the calcium flux to reach peak fluorescence intensity, whereas  $\tau_{50}$  and  $\tau_{75}$  represent the time it takes for the calcium flux to decay 50% and 75% of the peak fluorescence, respectively.

Relationships within the functional data was visualized utilizing R. Normalization to the zero mean, or Z-normalization, was utilized to normalize and scale each parameter to have a mean of 0 with a range near 1. This preprocessing step ensures allows us to study the correlation and similarities of our studied variables. t-Stochastic Neighbor Embedding (t-SNE), an unsupervised machine learning algorithm, was used for exploratory data analysis of the impact of pattern sizes on the measured variables of the organoids. This modern dimensionality technique is able to take high-dimensional data and reduce multidimensional relationships between data to a lower dimensional space in such a way that similar relationships are grouped

nearer to one another with a higher probability than dissimilar relationships or objects. This is accomplished by first creating a probability distribution of higher dimensional objects such that more similar pairs of higher dimensional objects are given a higher probability with more dissimilar points given a lower probability. A second probability distribution is then generated from this probability distribution for a lower dimensional map in such a way that preserves the maximum amount of similarity between the two probability distributions. t-SNE's ability to capture linear and nonlinear relationships between many variables makes it a powerful and versatile tool for investigating complex patterns while preserving higher dimensional structure of our data. t-SNE plots were generated using suggested parameters for perplexity (van der Maaten and Hinton, 2008), in order to condense the relationships between multiple recorded parameters down to a two-dimensional representative plot. Measurements were collected from mean values collected from 166 organoids. The actual t-SNE analysis was performed in R utilizing Jesse Krijthe's 2015 package Rtsne: T-Distributed Stochastic Neighbor Embedding using a Barnes-Hut Implementation (<https://github.com/jkrijthe/Rtsne>) to reduce the representation of our parameters to two dimensions. Pattern diameters were displayed by varying size and color of each point, and then individual parameters were investigated by applying a color gradient in the t-SNE plots. A heatmap of the same data was generated to visualize each variables impact with respect to pattern diameter concurrently (Gu et al., 2016), while a correlogram gives further insight into the impact between parameters (Wei et al., 2017) by utilizing Frank Harrell's Hmisc package to generate these figures <https://CRAN.R-project.org/package=Hmisc>.

### **Immunofluorescence staining and confocal microscopy**

Organoids were characterized based on immunofluorescence staining patterns of cardiac tissue and smooth muscle-like tissue. After video recording, samples were sacrificed and fixed with 4% (vol/vol) paraformaldehyde (PFA) for 10 minutes. After PFA treatment, samples were washed and permeabilized with 0.2% (vol/vol) Triton X-100, blocked with 2% (wt/vol) bovine serum albumin (BSA) and incubated with the appropriate dilution of primary antibodies for 1 hour at room temperature. After incubation, the

primary antibody was removed and washed with PBS. Secondary fluorescent antibodies were then incubated in the dark for 2 hours at appropriate dilutions and nuclei were tagged with 300 nM DAPI. All primary and secondary antibodies used are listed in Supplemental Table 2. Confocal microscopy (Zeiss U880) was used to capture z-stacks (8  $\mu\text{m}$  spacing between slices) of the organoids for height measurements and 3D reconstruction.

### **Morphological and structural characterization of cardiac organoids**

The cardiac organoids were assessed based on three parameters that characterize the overall cardiac tissue distribution and 3D morphology (Supplemental Fig. 2). All images were imported into ImageJ for image reconstruction and analysis. The *Area Ratio* was measured by using the circular or elliptical tool to approximate the area of fluorescence of tissue staining positive for cardiac tissue, and normalizing this area relative to the area of the entire pattern. The *Height* was measured by locating the top and bottom of the organoids using confocal microscopy. Lastly, the *FWHM* was determined by measuring the tissue diameter at half of the organoid height.

### **Zebrafish whole embryo culture (zWEC) embryotoxicity assay**

Transgenic *Tg(myl7:GFP)* zebrafish that express GFP exclusively in cardiomyocytes were used to observe myocardium development *in vivo* (Huang et al., 2003). Adult fish were bred to generate a few hundred synchronized embryos, which were divided into individual wells of approximately 50 embryos. The drug stocks were diluted in zebrafish embryo medium. Chemicals at the same concentrations described in Supplemental Table 1 were administered to chorionated zebrafish embryos within the first 5 hpf, which is the estimated equivalent to the time point when the chemicals are introduced to the human cardiac organoids. Fresh embryo medium with chemicals is replaced at 24 hpf, when the embryos have developed a prominent linear heart tube, but not yet undergone looping. At 48 hpf, cardiac morphology and looping were scored as the first assessment of cardiac developmental toxicity on *in vivo* organogenesis. zWEC embryotoxic potentials of each chemical were scored based on the percentage of embryos exhibiting distinct

cardiac morphology at 48 hpf. Normal looping (D-looping) refers to looping to the right-hand side of the embryo. Reverse looping (L-looping) is classified as looping towards the left side of the embryo, while no looping (N-looping) refers to a straight linear heart tube that has not successfully undergone cardiac looping events. A subset (~20%) of embryos, including controls, did not express the GFP transgene, potentially due to silencing, and therefore cannot be classified as D/L/N-looping in this assay. Treatments that produced a rate of GFP absence that was significantly higher than controls are considered to reflect a severe abnormality in myocardial development.

### **Statistical Analysis**

Data was plotted as box plots or mean  $\pm$  s.d. For single comparisons between two individual groups, a two-sided Student's t-test was used, and  $p \leq 0.05$  was considered significant. For comparisons between more than two groups, one-way analysis of variance (ANOVA) was performed and  $p \leq 0.05$  was considered significant. ANOVA analysis was supplemented with multiple comparison tests to determine significance between groups.

## References

- Gu, Z., Eils, R., and Schlesner, M. (2016). Complex heatmaps reveal patterns and correlations in multidimensional genomic data. *Bioinformatics* 32, 2847–2849.
- Hoang, P., Wang, J., Conklin, B.R., Healy, K.E., and Ma, Z. (2018). Generation of spatial-patterned early-developing cardiac organoids using human pluripotent stem cells. *Nat. Protoc.* 13, 723–737.
- Huang, C.J., Tu, C.T., Hsiao, C. Der, Hsieh, F.J., and Tsai, H.J. (2003). Germ-line transmission of a myocardium-specific GFP transgene reveals critical regulatory elements in the cardiac myosin light chain 2 promoter of zebrafish. *Dev. Dyn.* 228, 30–40.
- Huebsch, N., Loskill, P., Mandegar, M.A., Marks, N.C., Sheehan, A.S., Ma, Z., Mathur, A., Nguyen, T.N., Yoo, J.C., Judge, L.M., et al. (2015). Automated Video-Based Analysis of Contractility and Calcium Flux in Human-Induced Pluripotent Stem Cell-Derived Cardiomyocytes Cultured over Different Spatial Scales. *Tissue Eng. Part C Methods* 21, 467–479.
- Lian, X., Hsiao, C., Wilson, G., Zhu, K., Hazeltine, L.B., Azarin, S.M., Raval, K.K., Zhang, J., Kamp, T.J., and Palecek, S.P. (2012). Robust cardiomyocyte differentiation from human pluripotent stem cells via temporal modulation of canonical Wnt signaling. *Proc. Natl. Acad. Sci.* 109, E1848–E1857.
- Liu, W., Dong, W., Hoffman, E.J., Fernandez, T. V, and Gupta, A.R. (2019). CHD8 regulates the balance between proliferation and differentiation of human iPSCs in neural development. *bioRxiv* 732693.
- van der Maaten, L., and Hinton, G. (2008). Visualizing Data using t-SNE. *J. Mach. Learn. Res.* 9, 2579–2605.
- Wei, T., Simko, V., Levy, M., Xie, Y., Jin, Y., and Zemla, J. (2017). Visualization of a Correlation Matrix. *Statistician* 56, 316–324.
